# Supplementary material for: Atmospheric tomography using the Nordic Meteor Radar Clusterand Chilean Observation Network De Meteor Radars: networkdetails and 3DVAR retrieval
Source: Copernicus journal article supplement (doi:10.5194/amt-2021-124), 2021-05-17

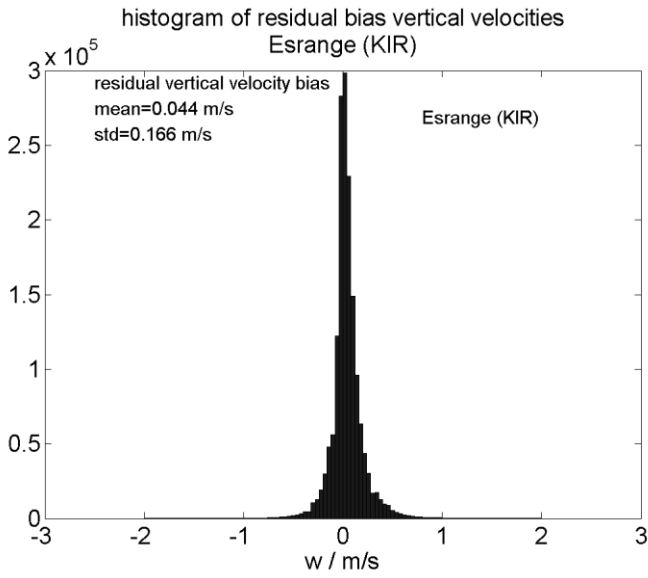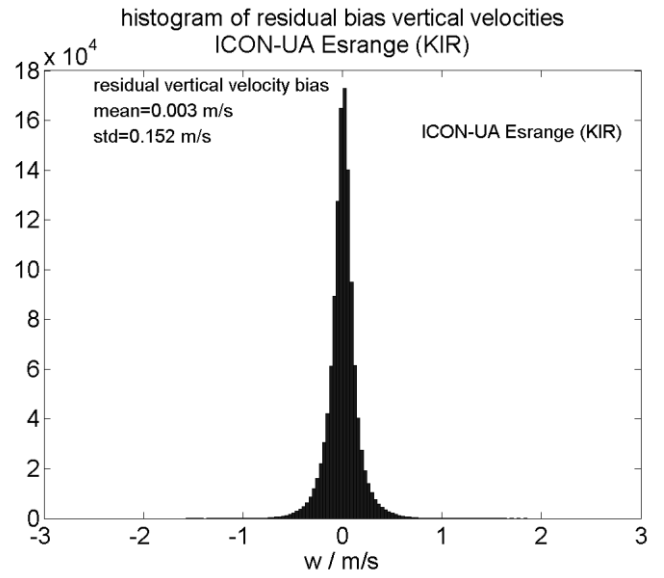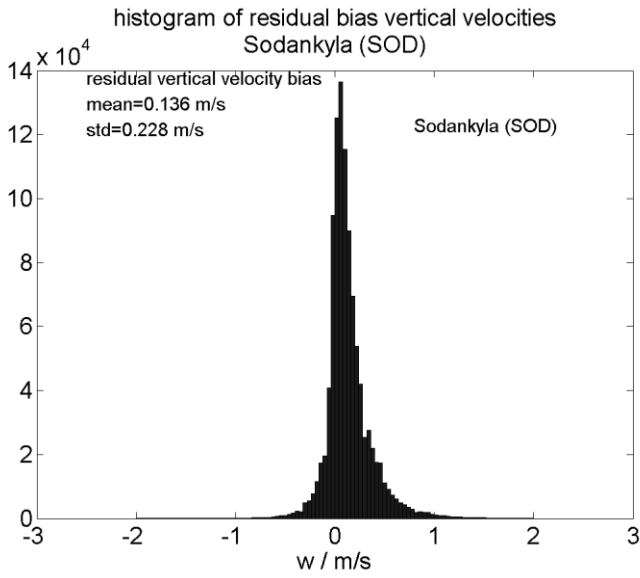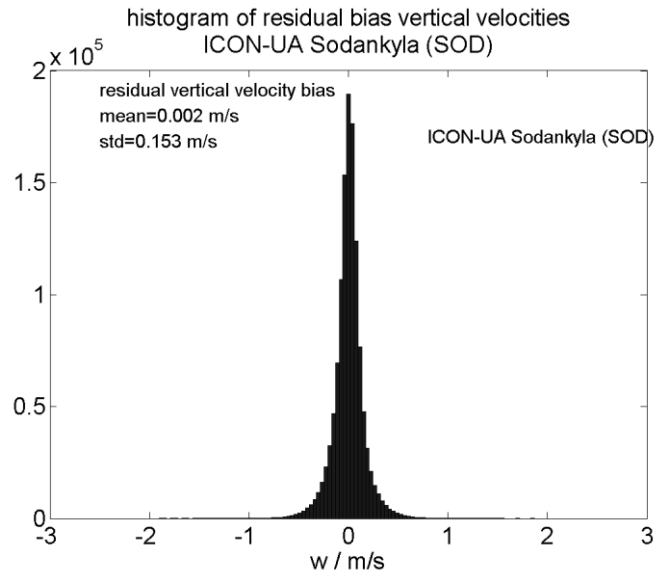

Supplement: Supplementary file [file amt-2021-124-AC1-supplement.pdf]
